# Supplementary material
Source: HighWire-hosted journal article supplement (http://www.jrheum.org/highwire/filestream/29803/field_highwire_adjunct_files/0/150917_Data_Suppl.pdf)
Supplement: 150917_Data_Suppl.pdf [file 150917_Data_Suppl.pdf]

**Supplementary Table 1.** Baseline descriptive data on biomarkers in cross-sectional and longitudinal cohorts.

| <b>Cross-sectional cohort</b> | <b>Whole sample</b><br>(Weighted N=252.5)<br><br>Mean (SD);<br>25 <sup>th</sup> , median, 75 <sup>th</sup> | <b>NCP</b><br>(Weighted N=34.4)<br><br>Mean (SD);<br>25 <sup>th</sup> , median, 75 <sup>th</sup> | <b>PRCP</b><br>(Weighted N=120.1)<br><br>Mean (SD);<br>25 <sup>th</sup> , median, 75 <sup>th</sup> | <b>ROA</b><br>(Weighted N=98.0)<br><br>Mean (SD);<br>25 <sup>th</sup> , median, 75 <sup>th</sup> |
|-------------------------------|------------------------------------------------------------------------------------------------------------|--------------------------------------------------------------------------------------------------|----------------------------------------------------------------------------------------------------|--------------------------------------------------------------------------------------------------|
| IB-C2C-HUSA                   | 450.8 (292.2);<br>268.1, 383.2, 525.0                                                                      | 276.3 (92.4);<br>221.6, 240.4, 356.0                                                             | 394.4 (241.2);<br>259.5, 338.5, 461.4                                                              | 588.0 (334.9);<br>342.0, 478.6, 726.0                                                            |
| sC2C (/100)                   | 248.9 (95.0);<br>181.9, 235.4, 282.6                                                                       | 245.4 (84.5);<br>180.3, 227.7, 292.3                                                             | 233.2 (81.8);<br>178.1, 230.0, 274.0                                                               | 268.9 (108.3);<br>195.5, 242.7, 301.0                                                            |
| uC2C (/10)                    | 361.9 (265.2);<br>217.0, 320.2, 431.0                                                                      | 335.0 (257.4);<br>155.3, 281.5, 464.4                                                            | 349.9 (182.2);<br>216.5, 334.2, 423.0                                                              | 386.2 (338.7);<br>234.0, 321.5, 440.3                                                            |
|                               |                                                                                                            |                                                                                                  |                                                                                                    |                                                                                                  |

| Supplementary Table 1 cont. |                                                                                                            |                                                                                                               |                                                                                                          |
|-----------------------------|------------------------------------------------------------------------------------------------------------|---------------------------------------------------------------------------------------------------------------|----------------------------------------------------------------------------------------------------------|
| <b>Longitudinal cohort</b>  | <b>Whole sample</b><br>(Weighted N=160.5)<br><br>Mean (SD);<br>25 <sup>th</sup> , median, 75 <sup>th</sup> | <b>Non-progressors</b><br>(Weighted N=136.1)<br><br>Mean (SD);<br>25 <sup>th</sup> , median, 75 <sup>th</sup> | <b>Progressors</b><br>(Weighted N=24.4)<br><br>Mean (SD);<br>25 <sup>th</sup> , median, 75 <sup>th</sup> |
| IB-C2C-HUSA                 | 466.1 (277.4);<br>298.6, 409.1, 528.4                                                                      | 430.9 (215.5);<br>295.4, 383.5, 523.3                                                                         | 659.8 (446.5);<br>342.0, 489.5, 941.6                                                                    |
| sC2C (/100)                 | 244.7 (84.3);<br>182.0, 230.9, 281.9                                                                       | 247.9 (84.6);<br>189.3, 232.6, 286.5                                                                          | 226.5 (81.8);<br>167.6, 228.0, 271.3                                                                     |
| uC2C (/10)                  | 377.0 (306.0);<br>227.8, 333.3, 429.1                                                                      | 386.1 (327.1);<br>230.9, 337.8, 439.0                                                                         | 325.4 (144.8);<br>216.5, 303.4, 407.2                                                                    |

“/100” and “/10” indicates a change in factor by 100 and 10, respectively, for comparability of the scale of the numbers. Units are pg/ml for serum C2C and ng/mmol creatinine for urine C2C and urine IB-C2C-HUSA. NCP: no cartilage pathology; PRCP: preradiographic cartilage pathology; ROA: radiographic osteoarthritis; IB-C2C-HUSA: human urine sandwich assay; sC2C: serum C2C; uC2C: urine C2C.

## Supplementary Figure 1.

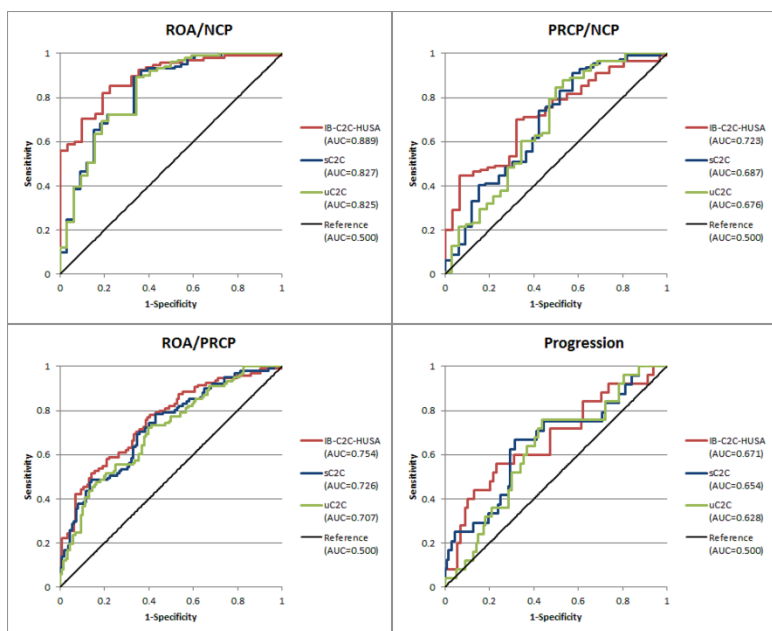

Receiver-operating characteristic curves for prediction of ROA vs NCP, PRCP vs NCP, ROA vs PRCP and progression for urine IB-C2C-HUSA, serum C2C, and urine C2C. NCP: no cartilage pathology; PRCP: preradiographic cartilage pathology; ROA: radiographic osteoarthritis; AUC: area under the curve; IB-C2C-HUSA: human urine sandwich assay.

**Supplementary Table 2.** Pearson correlation coefficients of biomarkers for the whole cohort and subgroups.

|              |             | sC2C                            |         | uC2C                            |         |
|--------------|-------------|---------------------------------|---------|---------------------------------|---------|
|              |             | Pearson correlation coefficient | p-value | Pearson correlation coefficient | p-value |
| Whole cohort |             |                                 |         |                                 |         |
|              | IB-C2C-HUSA | 0.123                           | 0.059   | 0.052                           | 0.418   |
|              | sC2C        | -                               | -       | -0.018                          | 0.776   |
| NCP          |             |                                 |         |                                 |         |
|              | IB-C2C-HUSA | 0.320                           | 0.079   | 0.160                           | 0.391   |
|              | sC2C        | -                               | -       | -0.191                          | 0.294   |
| PRCP         |             |                                 |         |                                 |         |
|              | IB-C2C-HUSA | 0.134                           | 0.164   | 0.091                           | 0.334   |
|              | sC2C        | -                               | -       | 0.058                           | 0.543   |

Online supplement to: Ability of a Urine Assay of Type II Collagen Cleavage by Collagenases to Detect Early Onset and Progression of Articular Cartilage Degeneration: Results from a Population-based Cohort Study, *The Journal of Rheumatology*; doi:10.3899/jrheum.150917

| Supplementary Table 2 cont. |             |       |       |        |       |
|-----------------------------|-------------|-------|-------|--------|-------|
| ROA                         |             |       |       |        |       |
|                             | IB-C2C-HUSA | 0.019 | 0.858 | -0.003 | 0.974 |
|                             | sC2C        | -     | -     | -0.044 | 0.669 |
| Nonprogressor               |             |       |       |        |       |
|                             | IB-C2C-HUSA | 0.165 | 0.063 | 0.034  | 0.700 |
|                             | sC2C        | -     | -     | -0.070 | 0.426 |
| Progressors                 |             |       |       |        |       |
|                             | IB-C2C-HUSA | 0.112 | 0.611 | -0.121 | 0.563 |
|                             | sC2C        | -     | -     | -0.418 | 0.047 |

NCP: no cartilage pathology; PRCP: preradiographic cartilage pathology; ROA: radiographic osteoarthritis; IB-C2C-HUSA: human urine sandwich assay; sC2C: serum C2C.
